# Supplementary material for: Fusarioid community diversity associated with conifer seedlings in forest nurseries across the contiguous USA
Source: PubMed Central journal article supplement (PMC9930990; doi:10.3389/fpls.2023.1104675), 2023-01-25

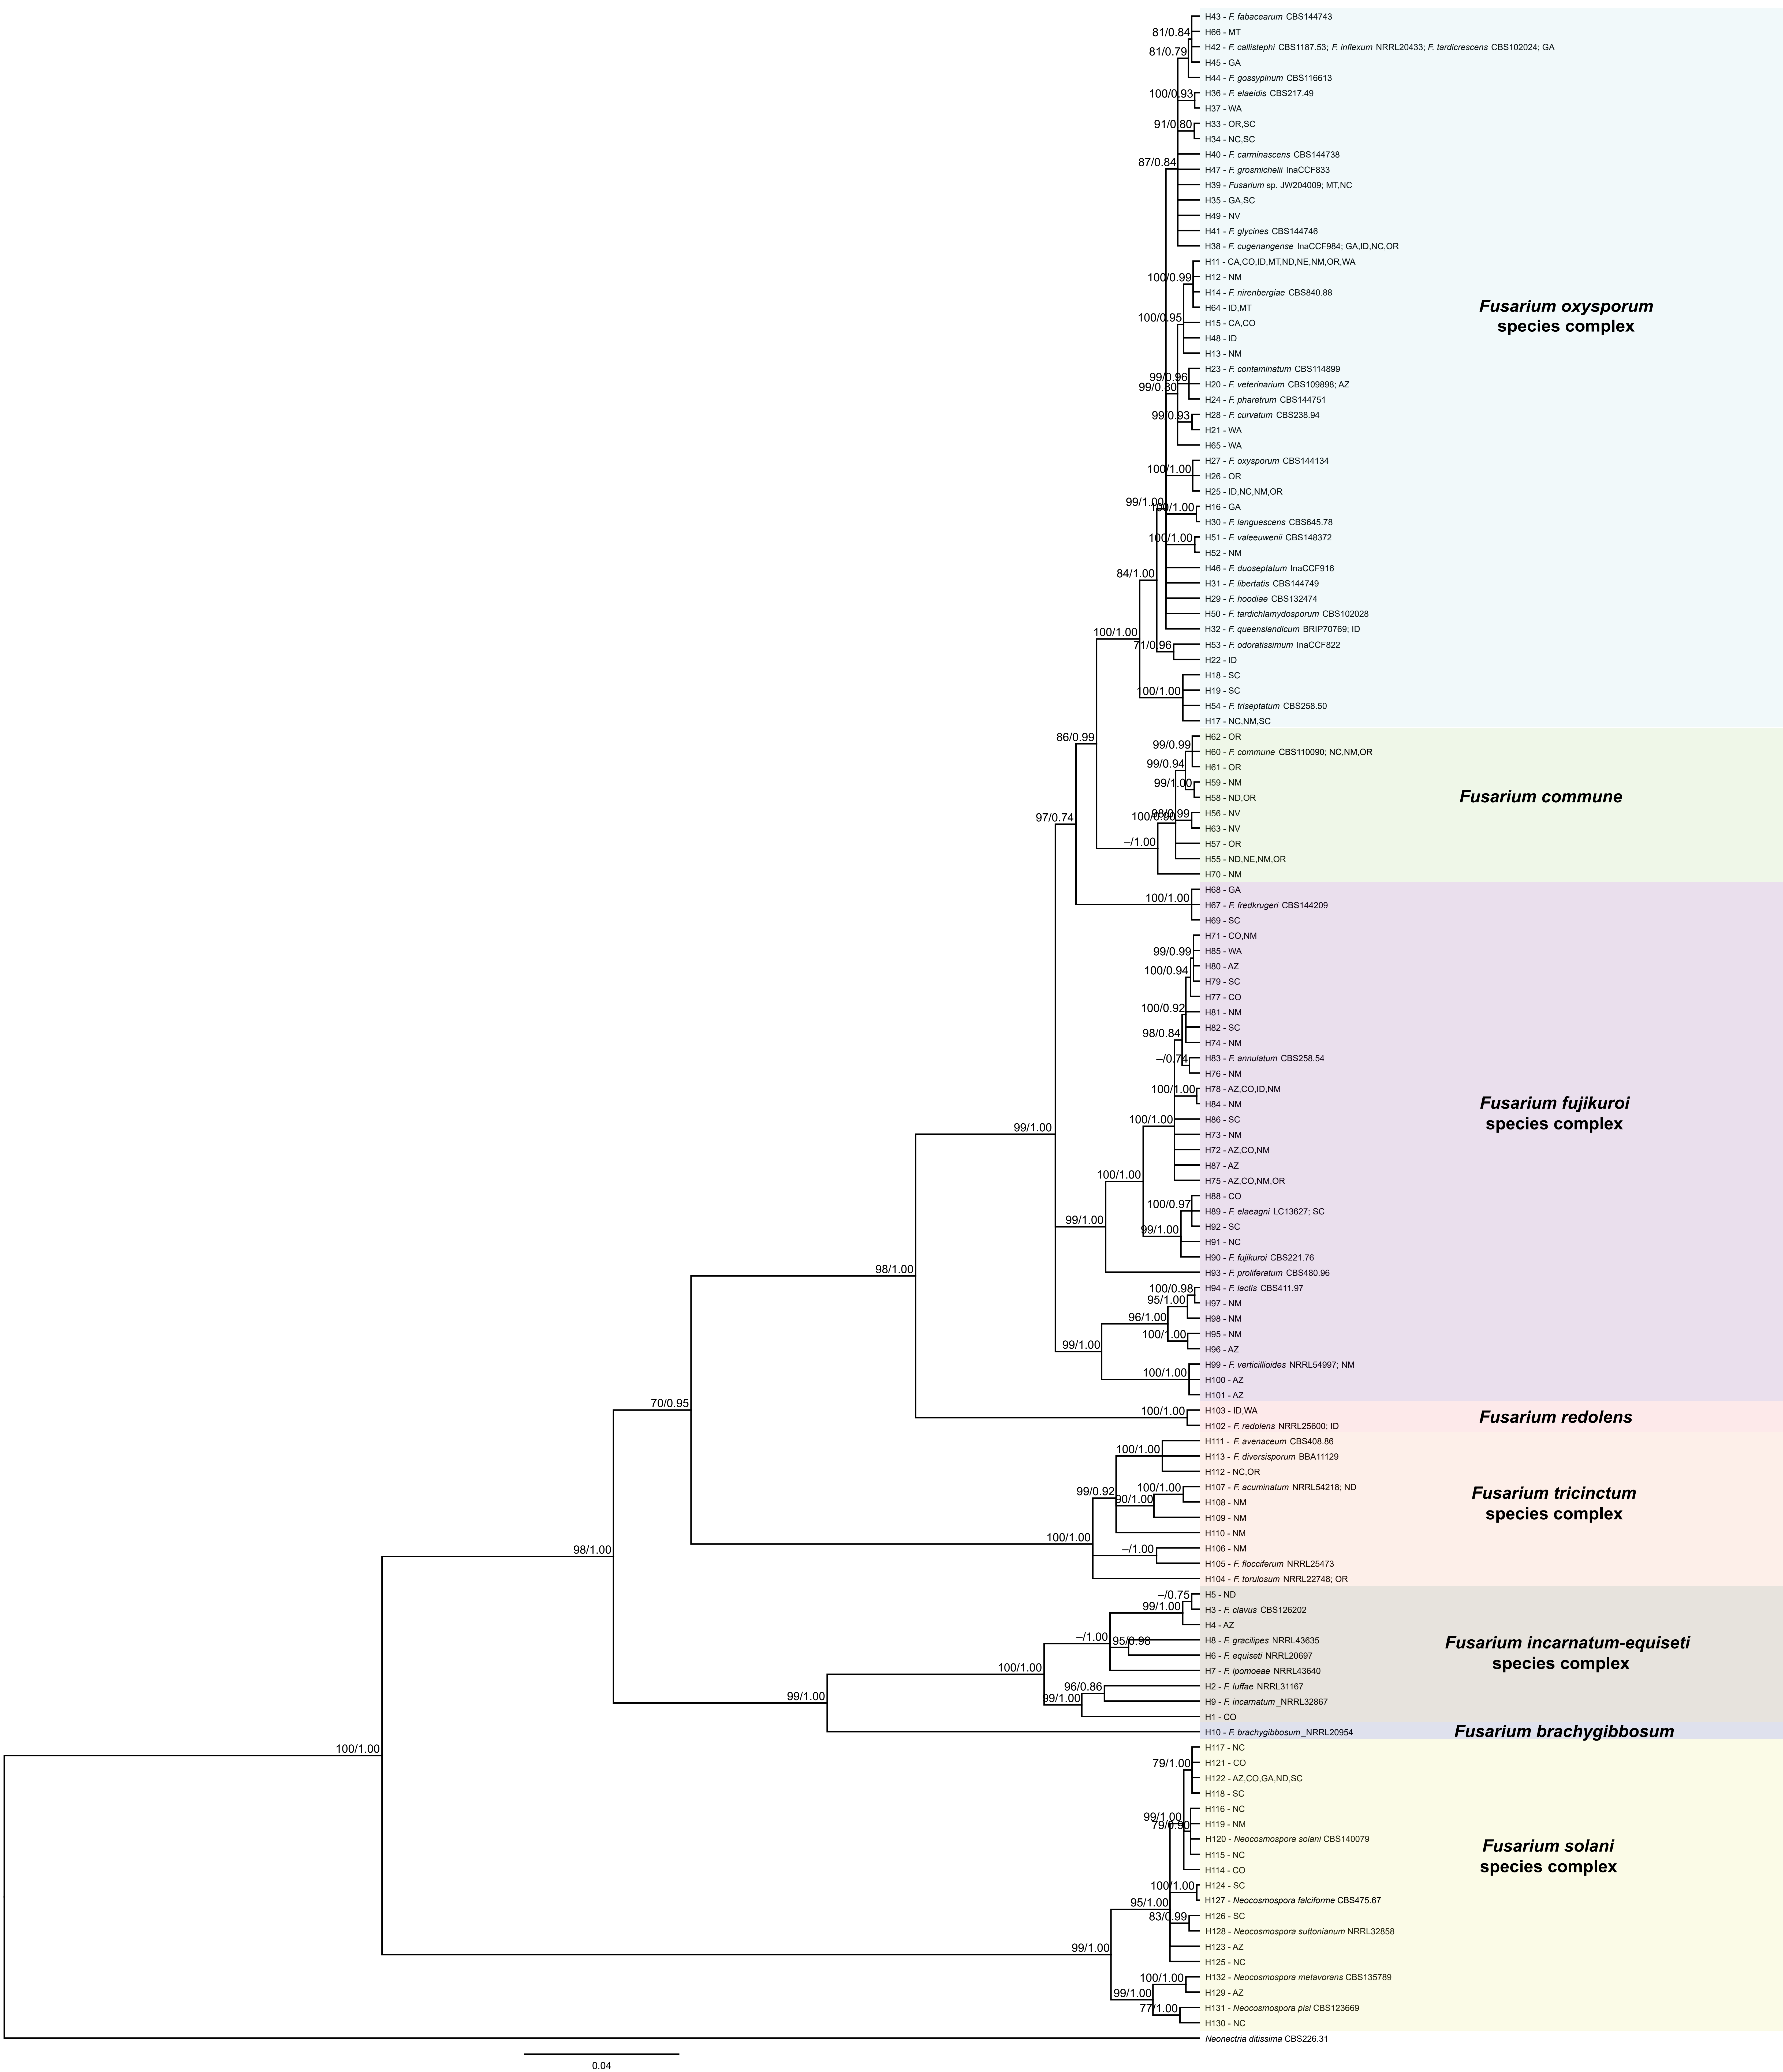

Supplement: DataSheet_2.pdf [file DataSheet_2.pdf]
